# Supplementary material for: Pro-apoptotic and anti-angiogenic actions of 2-methoxyestradiol and docosahexaenoic acid, the biologically derived active compounds from flaxseed diet, in preventing ovarian cancer
Source: Springer Nature journal article supplement (doi:10.1186/s13048-019-0523-3), 2019-05-25
Supplement: MOESM1 [file 16750952]

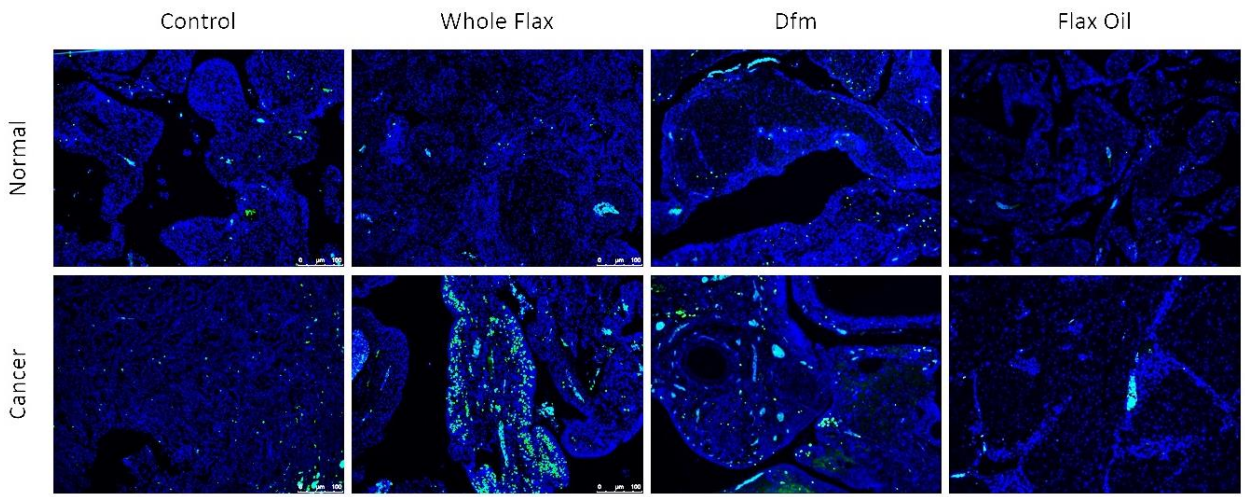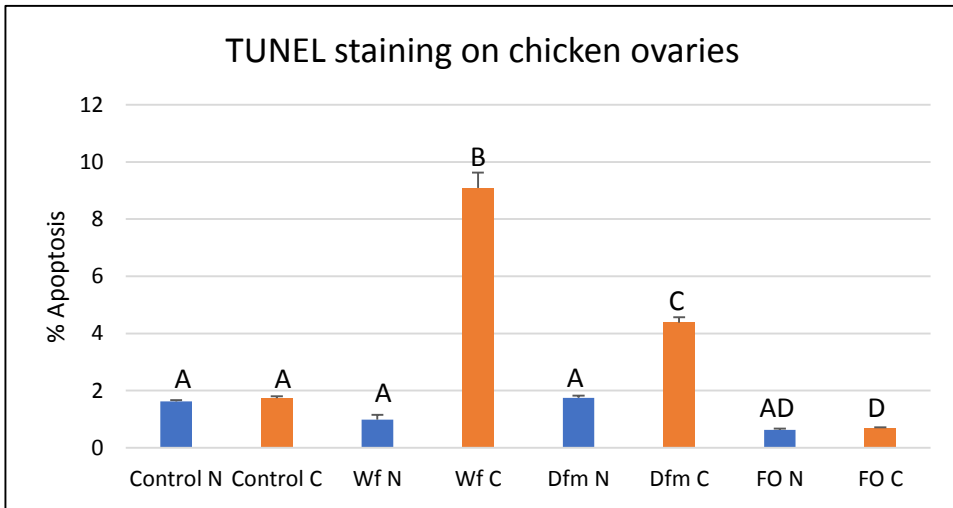

Figure 1

**A**

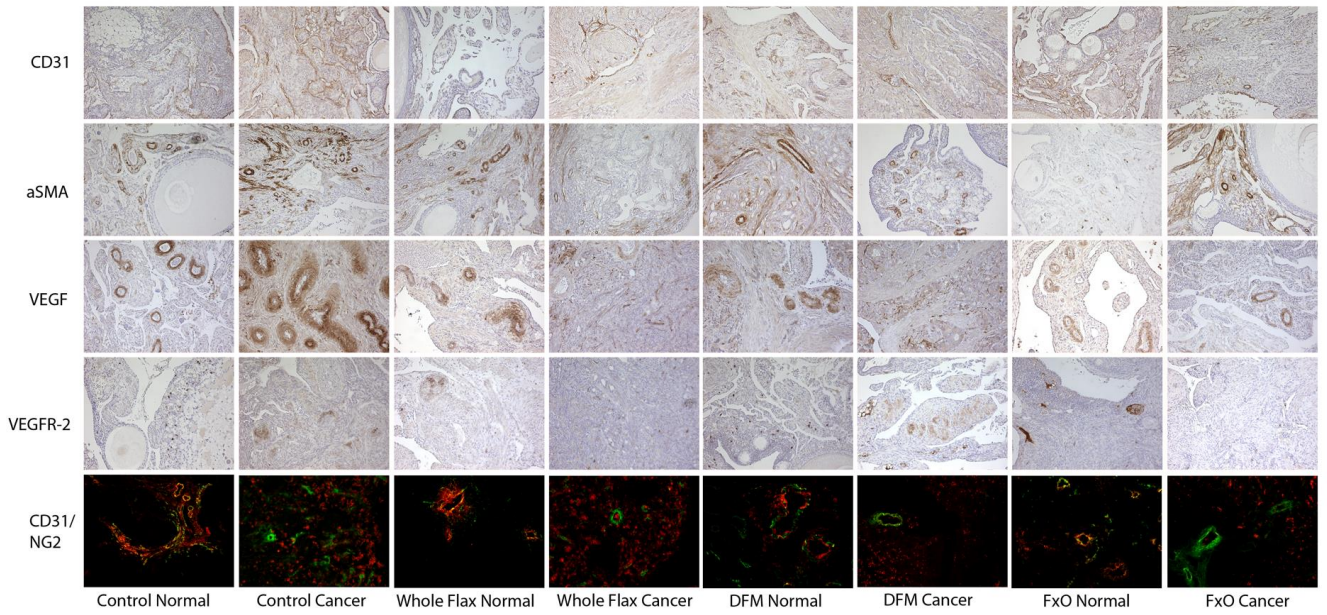

**B**

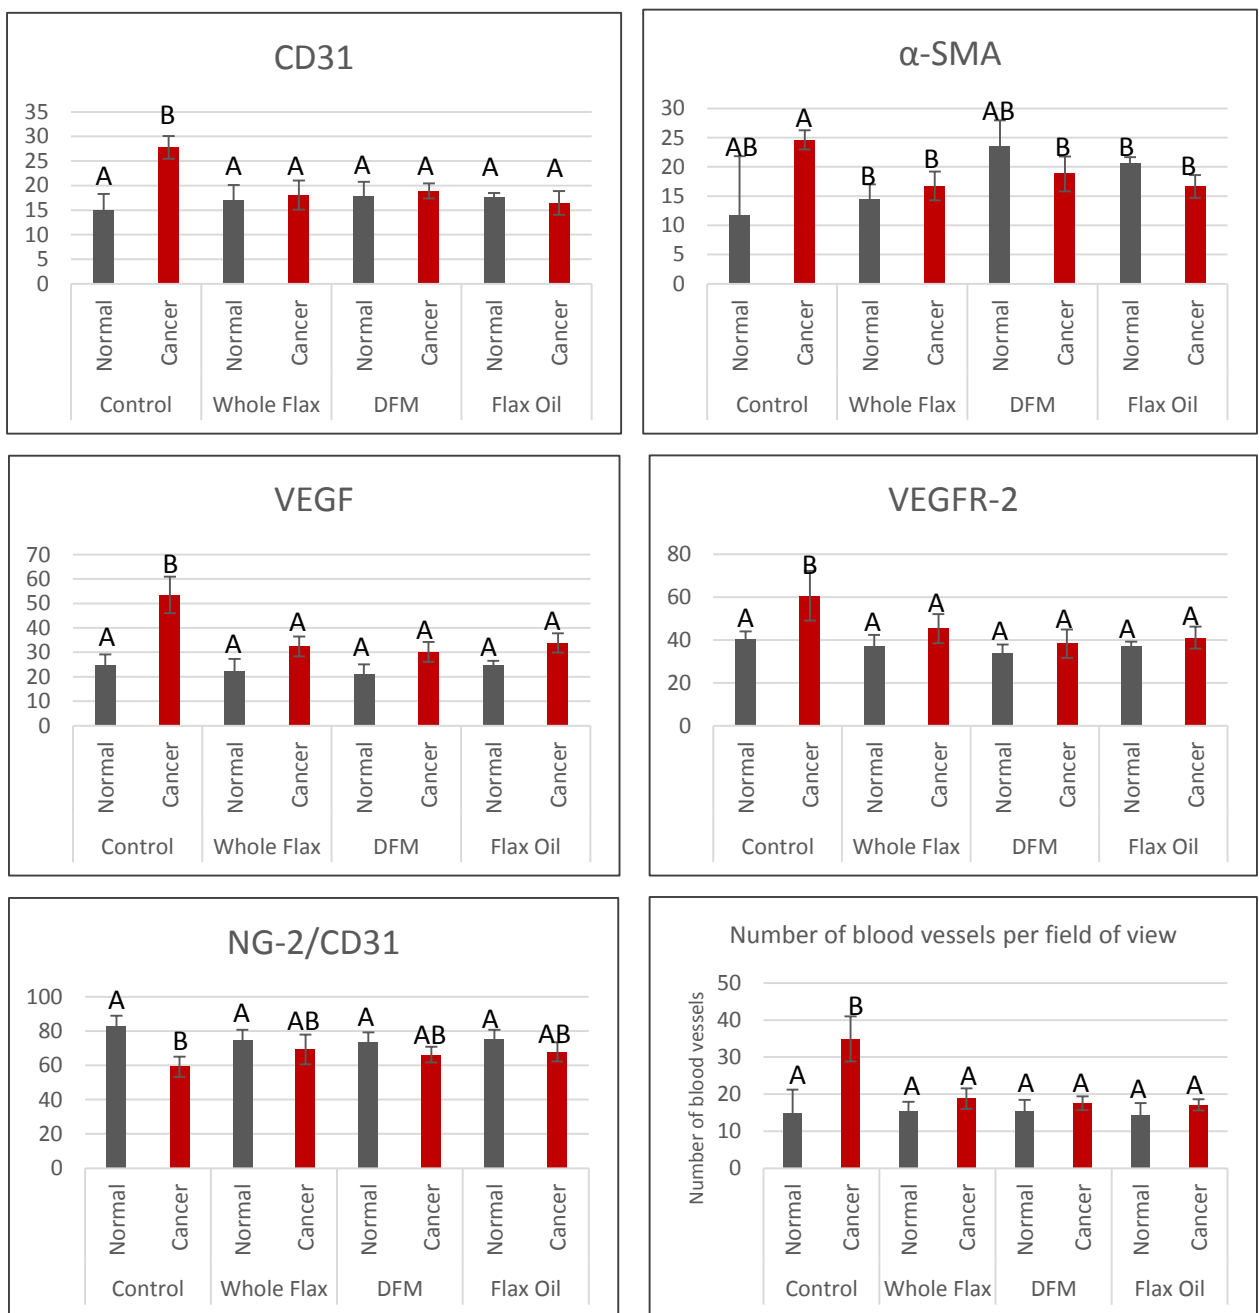

**Figure 2**

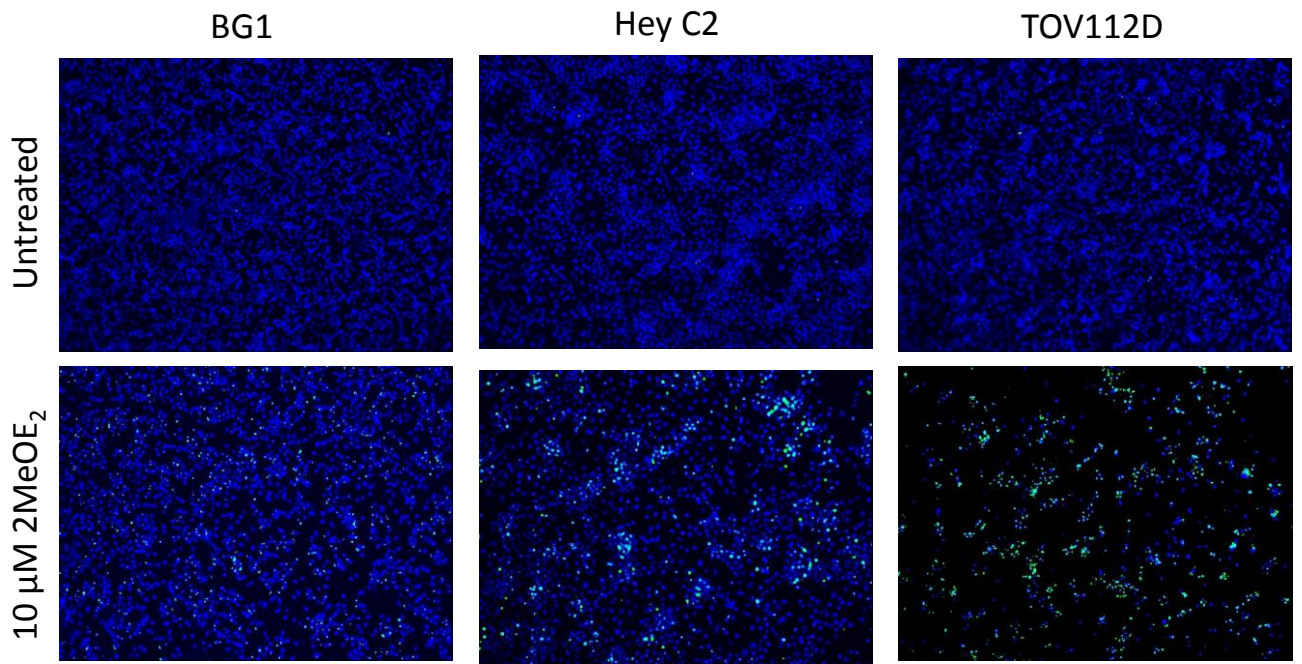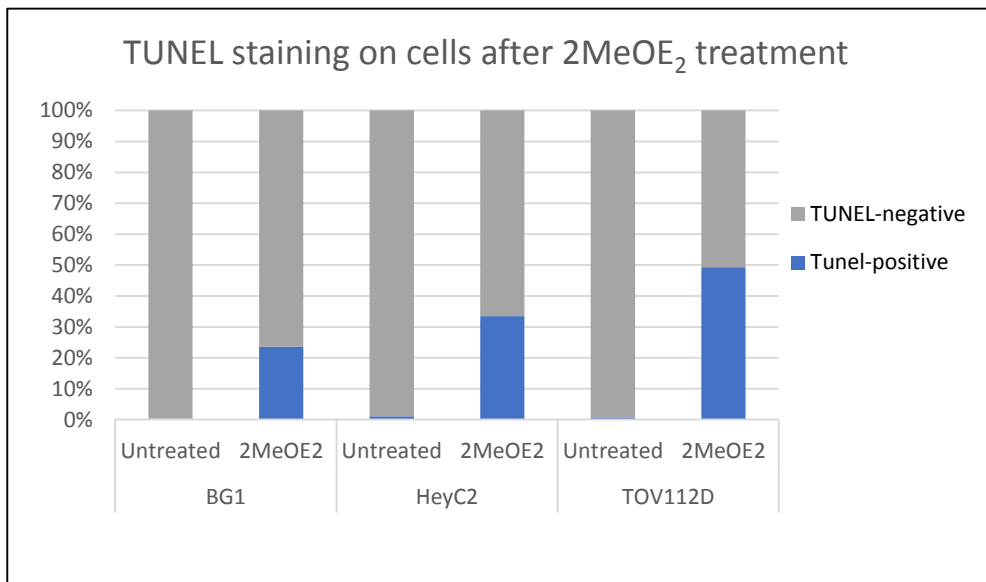

Figure 3



A

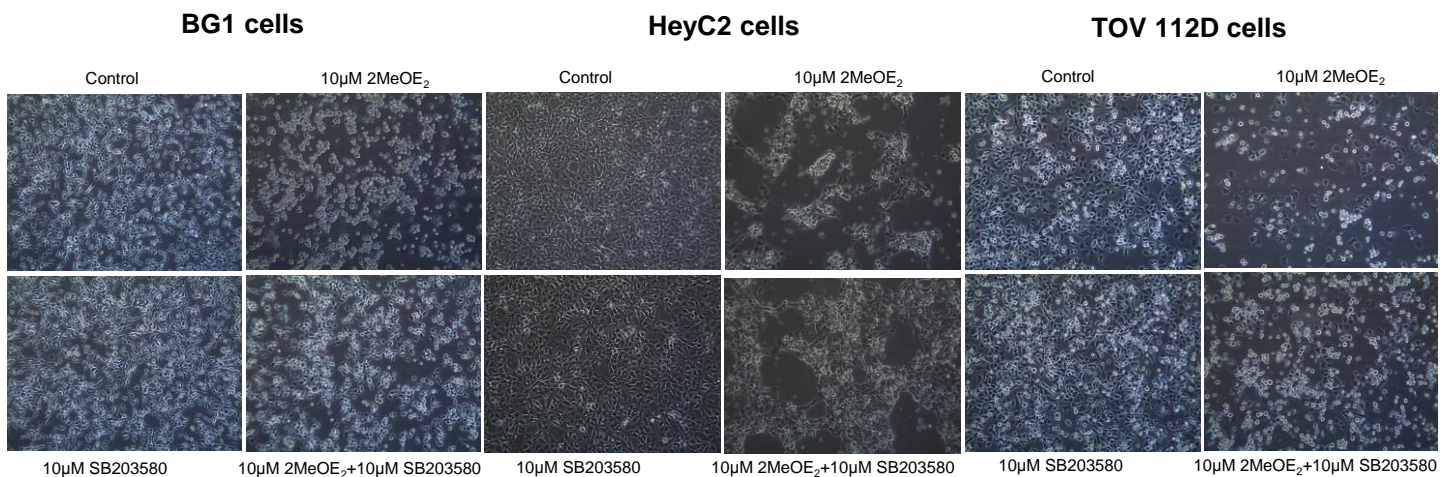

B

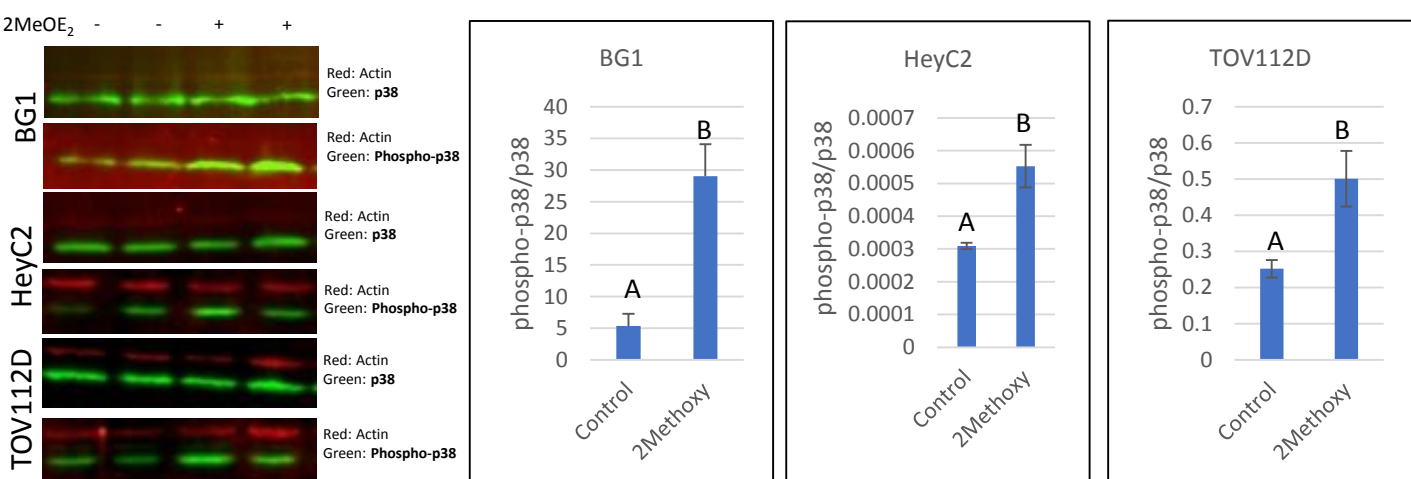

C

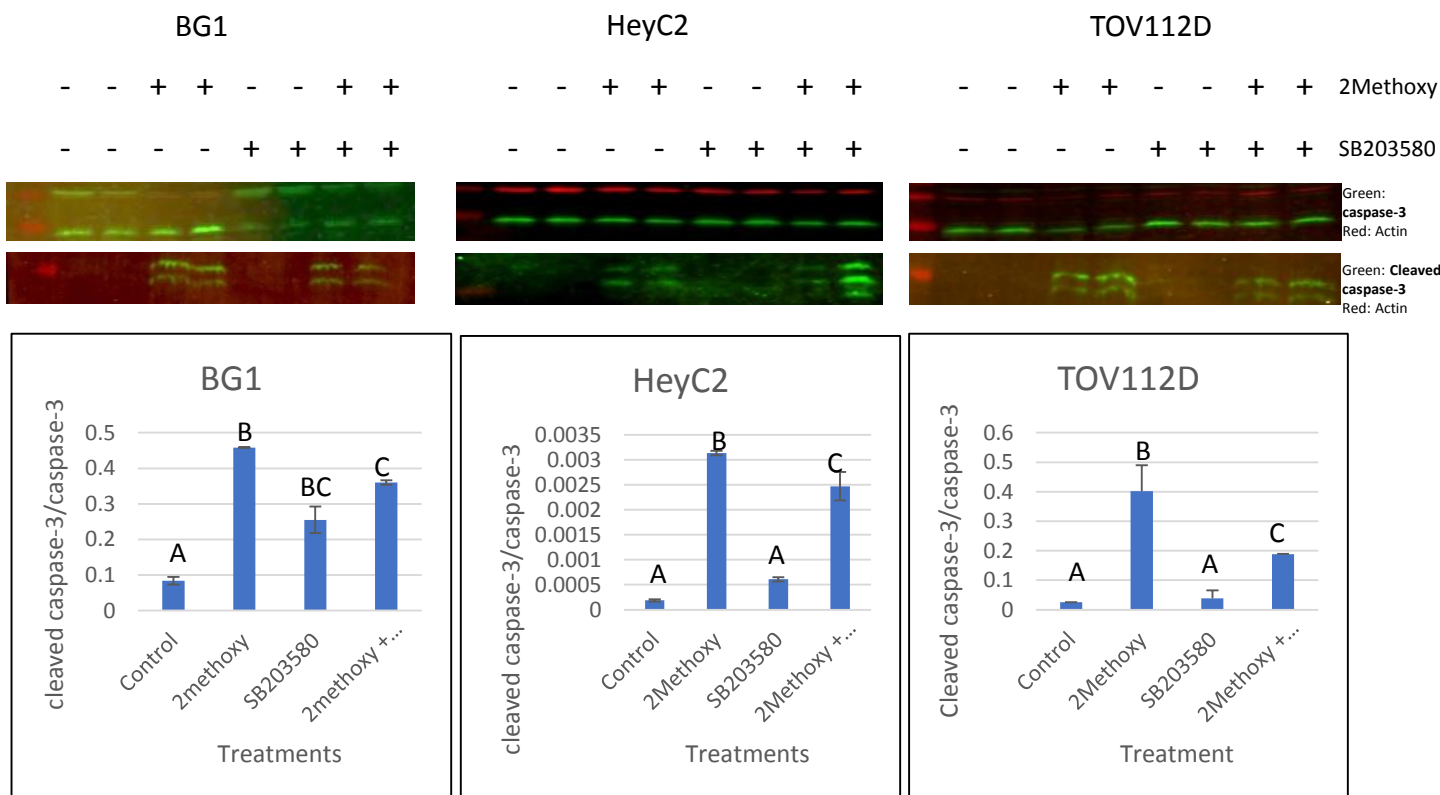

Figure 4

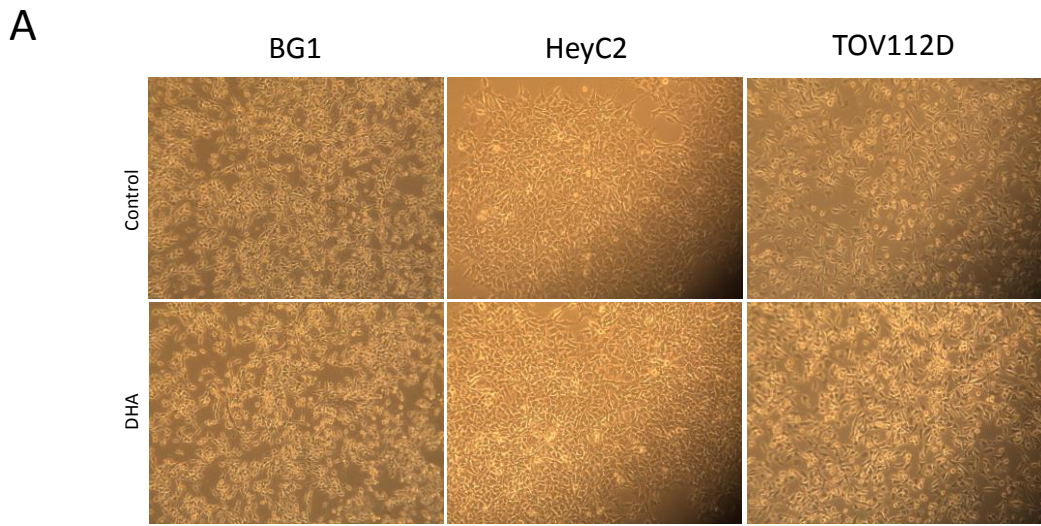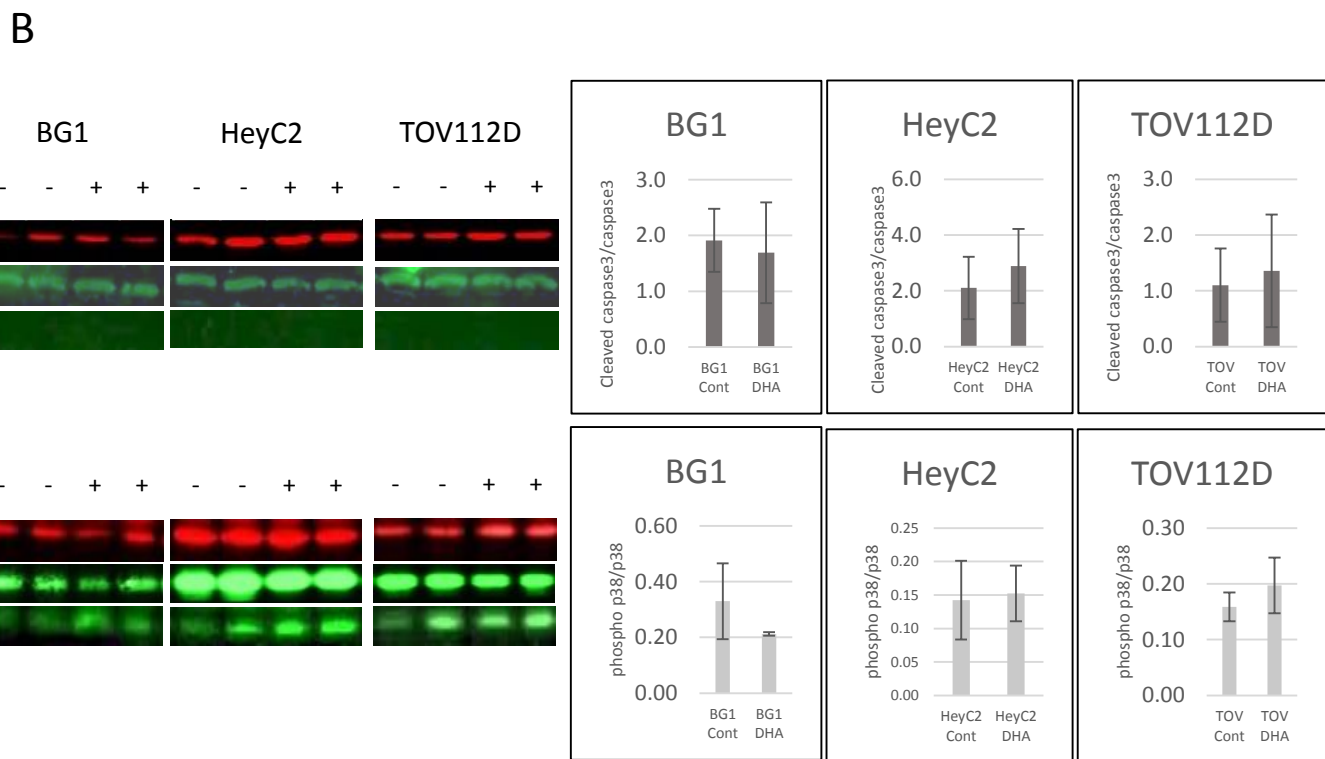

Figure 5

A

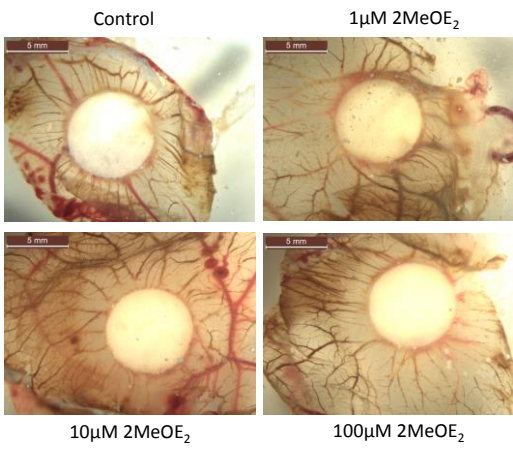

Dose dependent effect of 2MeOE<sub>2</sub> on CAM

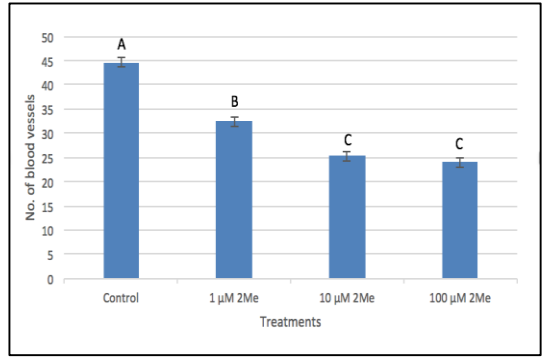

B

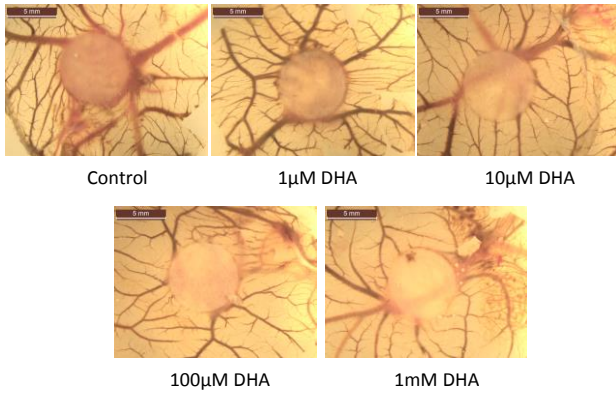

Dose dependent effect of DHA on CAM

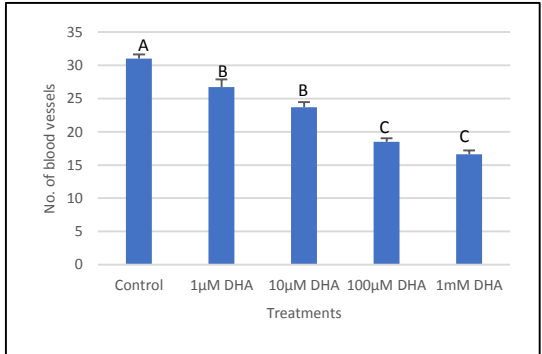

Figure 6

**A**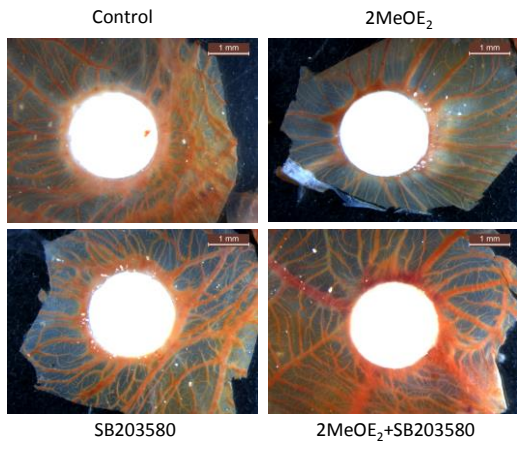CAM assay – 2MeOE<sub>2</sub> with SB203580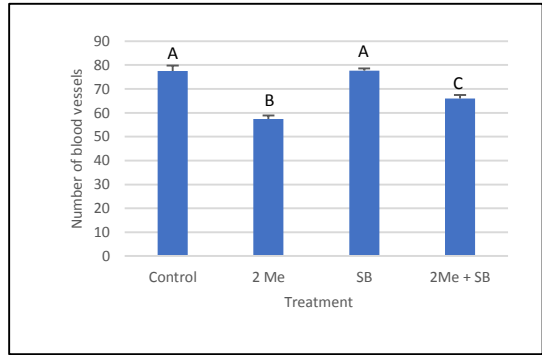**B**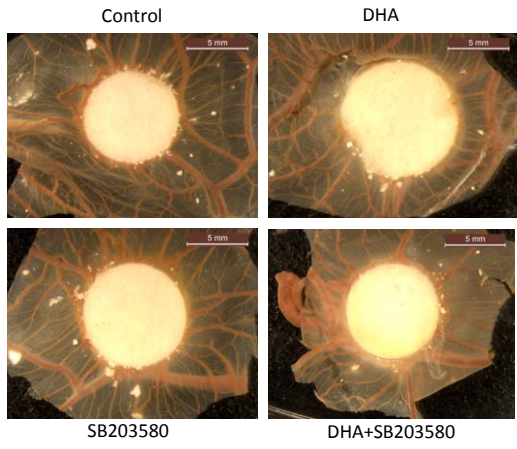

CAM assay – DHA with SB203580

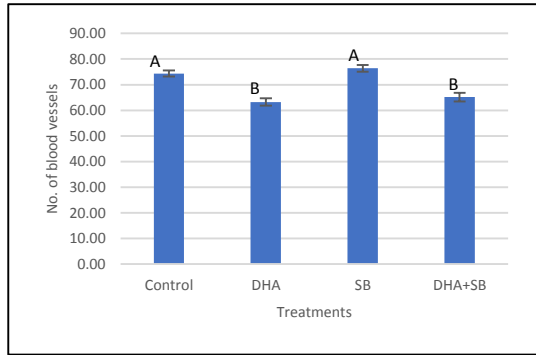

Figure 7



BG1

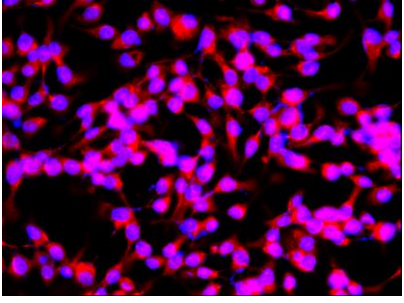

HEYC2

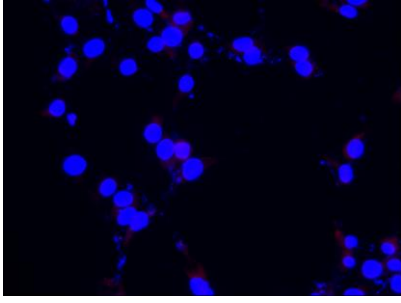

TOV112D

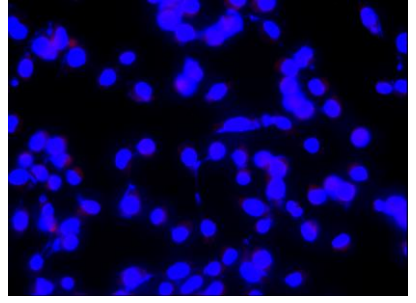

Supplementary 1



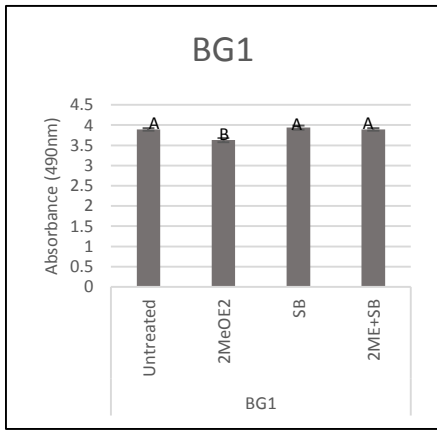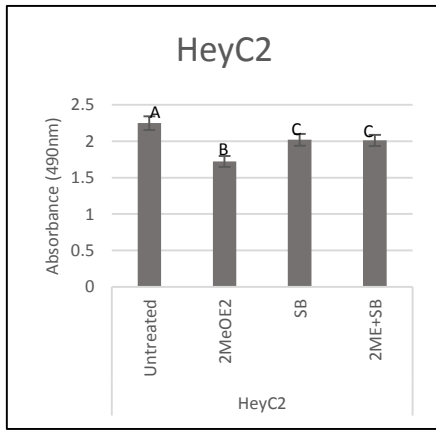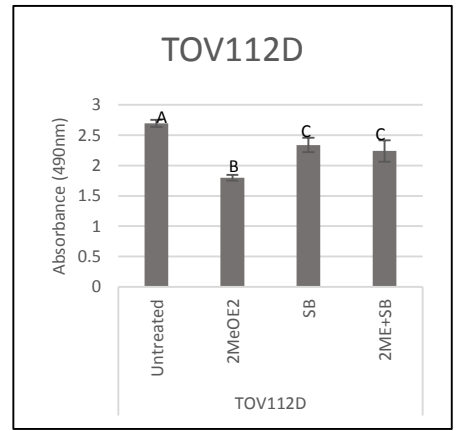

## Supplementary 2
